# Supplementary material
Source: PubMed Central journal article supplement (PMC3839849)
Supplement: NIHMS526276-supplement-01.pdf [file NIHMS526276-supplement-01.pdf]

12 June 2013

**Supplementary material for:**

**Apo-states of calmodulin and CaBP1 control Ca<sub>v</sub>1 voltage-gated calcium channel function through direct competition for the IQ domain**

Felix Findeisen<sup>1,3</sup>, Christine Rumpf<sup>1,3</sup>, and Daniel L. Minor, Jr.<sup>1,2,3,4\*</sup>

<sup>1</sup>Cardiovascular Research Institute

<sup>2</sup>Departments of Biochemistry and Biophysics, and Cellular and Molecular Pharmacology

<sup>3</sup>California Institute for Quantitative Biomedical Research

University of California, San Francisco, California 94158-2330

<sup>4</sup>Physical Biosciences Science Division

Lawrence Berkeley National Laboratory

Berkeley, CA 94720 USA

**Inventory of Supplementary Material:**

Supplementary Figures S1-S2

## Supplementary Fig. S1

Findeisen *et al.*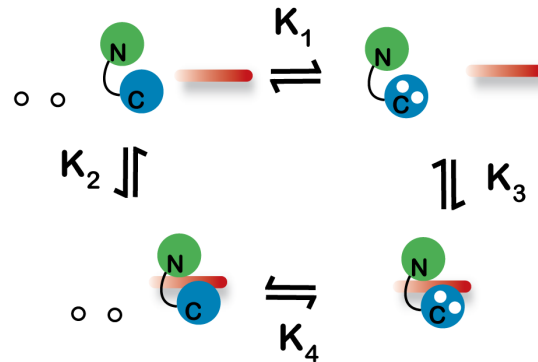

**Supplementary Fig. S1 Thermodynamic analysis of CaM, Ca<sup>2+</sup>, and IQ domain binding**  
 Macroscopic thermodynamic cycle for CaBP1, Ca<sup>2+</sup> and Cav1.2 IQ domain.  $K_1$  and  $K_4$  describe Ca<sup>2+</sup> binding to CaBP1 and the CaBP1/IQ complex, respectively.  $K_2$  and  $K_3$  describe IQ domain binding to calcium-free CaBP1 and Ca<sup>2+</sup>/CaBP1, respectively.

## Supplementary Fig. S2

Findeisen *et al.*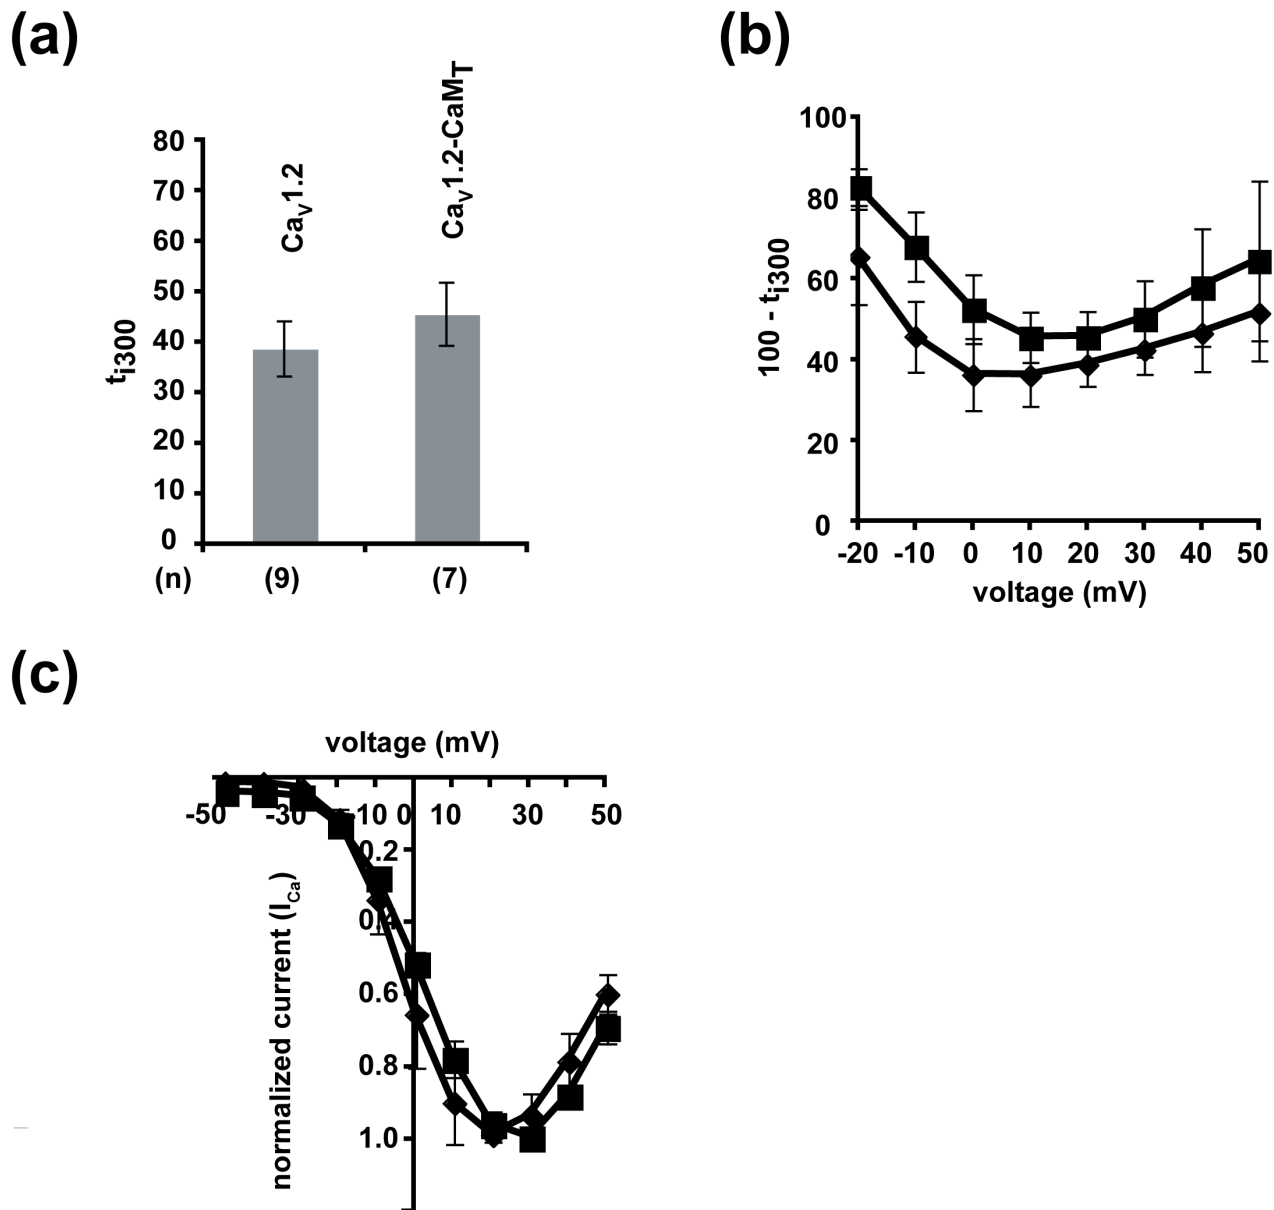

**Supplementary Fig. S2 Functional properties of  $Ca_v1.2-CaM_T$  are similar to the parent channel**  
**a**, Averaged  $t_{i300}$  from normalized  $I_{Ca}$  traces at a test potential of +20 mV from *Xenopus* oocytes expressing  $Ca_v1.2$  or  $Ca_v1.2-CaM_T$ . In all experiments mRNA for  $Ca_v\beta_{2a}$  and  $Ca_v\alpha_{2\delta-1}$  were injected at equimolar concentrations to  $Ca_v1.2$ . (n) indicates the number of experiments. **b**, Averaged remaining normalized current after 300 ms ( $100 - t_{i300}$ ) at different test voltages from oocytes expressing  $Ca_v1.2$  (◆) or  $Ca_v1.2-CaM_T$  (■). **c**, Averaged normalized  $I_{Ca}$  as a function of voltage. Symbols are the same as in 'b'.
